# Supplementary material for: Adaptive filter parameter reconstruction technology for rocket inertial navigation/satellite integrated navigation system
Source: PeerJ Comput Sci. 2025 Jul 23;11:e3040. doi: 10.7717/peerj-cs.3040 (PMC12453862; doi:10.7717/peerj-cs.3040)
Supplement: Supplemental Information 3 [file peerj-cs-11-3040-s003.docx]

Table S1. Digital Simulation Noise Modeling Setup

| Stage | Device | Performance | Parameter |
| --- | --- | --- | --- |
| 1 | Gyroscope | Integrated zero position |  |
| 2 | Gyroscope | Angular random walk factor |  |
| 3 | Accelerometer | Integrated zero position |  |
| 4 | Accelerometer | Angular random walk factor |  |
| 5 | GNSS | Velocity measurement noise |  |
| 6 | GNSS | Position measurement noise |  |
