# Supplementary material for: Adaptive filter parameter reconstruction technology for rocket inertial navigation/satellite integrated navigation system
Source: PeerJ Comput Sci. 2025 Jul 23;11:e3040. doi: 10.7717/peerj-cs.3040 (PMC12453862; doi:10.7717/peerj-cs.3040)
Supplement: Supplemental Information 4 [file peerj-cs-11-3040-s004.docx]

Table S2. Filter Initial Parameter Configuration

| Stage | Filter Parameter | Parametric Value | |
| --- | --- | --- | --- |
| 1 | Initial position | |  |
| 2 | Initial velocity |  | |
| 3 | Initial attitude information  (pitch, yaw, roll) |  | |
| 4 | Initial state vector |  | |
| 5 | Initial associated variance |  | |
| 6 | Initial value of process noise  Covariance |  | |
| 7 | Initial value of measurement  noise covariance |  | |
